# Supplementary material for: Effectiveness of enteral feeding protocol on clinical outcomes in critically ill patients: A before and after study
Source: PLoS One. 2017 Aug 3;12(8):e0182393. doi: 10.1371/journal.pone.0182393 (PMC5542540; doi:10.1371/journal.pone.0182393)
Supplement: S2 Table — (CSV) [file pone.0182393.s002.csv]

	Stages	Center	Sex	Age	height	Weight	BMI	ICU.Int.Y	ICU.Sur.Y	ICU.Emerg.Y	Sep	AKI	Glucocorticoid	malnutri	NRS2002	target.energy	Vaso	MV	AGI.I	AGI.II	AGI.III	AGI.IV	EN.d1	EN.T	EN.W	en.prop.d1	PN.d1	GLU.Min	GLU.Max	Insulin	APACHE	SOFA	icu.out.status	X28_Sur_Y	X90_Sur_Y	ICU_T	dur.mv	Infection_Y	mort28
1	Stage 1	QZ	male	83	172	70	23.66	1	0	0	0	1	1	1	5	1750	1	1	1	0	0	0	1	24	1	17.14	1	8.1	14.1	0	23	4	transfer	1	1	10	3	0	0
2	Stage 1	QZ	male	87	172	60	20.28	1	0	0	0	1	1	1	3	1500	0	0	1	0	0	0	1	24	1	20	1	6.5	10	10	9	4	transfer	1	1	23	0	0	0
3	Stage 1	QZ	male	43	170	72.5	25	1	0	0	0	1	0	0	NA	1800	1	1	1	0	0	0	1	24	1	16.67	1	6.5	10.2	0	25	4	transfer	1	1	6	2	0	0
4	Stage 1	QZ	male	37	170	65	22.5	0	0	0	0	0	0	0	NA	1625	0	0	1	0	0	0	0	NA	1	NA	1	6.5	10.1	0	18	4	transfer	1	1	8	0	0	0
5	Stage 1	QZ	male	74	168	60	21.3	1	0	0	0	1	0	0	3	1500	0	0	1	0	0	0	0	NA	2	NA	0	5.5	9.1	0	16	4	transfer	1	1	20	10	1	0
6	Stage 1	QZ	female	86	160	50	19.5	1	0	0	0	1	0	0	3	1250	0	1	1	0	0	0	0	NA	NA	NA	1	6.1	9.2	0	14	3	transfer	1	1	5	3	0	0
7	Stage 1	QZ	male	58	172	60	20.28	0	0	1	0	0	0	0	NA	1800	1	1	1	0	0	0	1	24	1	25	1	6.2	8.5	0	18	4	transfer	1	1	6	1	0	0
8	Stage 1	QZ	male	80	175	55	17.96	1	0	0	0	0	0	0	3	1375	0	1	1	0	0	0	1	24	1	21.8	1	7.2	10	0	21	6	transfer	1	1	24	20	1	0
9	Stage 1	QZ	female	69	160	60	23.4	1	0	0	0	0	0	0	3	1500	1	1	1	0	0	0	0	NA	1	NA	1	6.1	9.7	0	21	13	transfer	1	1	10	2	1	0
10	Stage 1	QZ	male	78	170	65	22.491	0	0	1	0	0	1	0	3	1300	0	1	1	0	0	0	0	NA	1	NA	1	6.7	11.8	0	16	3	AAD	0	0	4	4	0	1
11	Stage 1	QZ	female	49	165	65	23.88	1	0	0	0	0	1	0	NA	1625	1	1	1	0	0	0	1	24	1	18.46	1	7	10	0	19	4	transfer	1	1	6	2	0	0
12	Stage 1	QZ	female	83	165	50	18.37	1	0	0	0	0	0	1	6	1250	0	1	0	0	0	0	1	24	2	24	1	6.1	15	0	19	5	transfer	1	1	75	26	0	0
13	Stage 1	QZ	male	80	173	62	20.72	1	0	0	0	1	1	1	6	1550	1	1	1	0	0	0	1	24	1	19.35	1	5.8	8.5	0	19	5	transfer	1	1	12	7	0	0
14	Stage 1	QZ	male	77	165	65	23	1	0	0	0	0	0	1	4	1000	0	0	0	1	0	0	0	NA	2	0	0	6.5	9.1	0	7	3	transfer	1	1	39	39	0	0
15	Stage 1	QZ	female	52	165	55	20.2	1	0	0	0	0	0	0	NA	1375	1	1	1	0	0	0	1	24	1	21.82	1	7.2	9.8	6	13	8	transfer	1	1	NA	3	0	0
16	Stage 1	QZ	male	90	170	65	22.5	1	0	0	0	0	0	1	4	1625	0	1	1	0	0	0	0	NA	NA	NA	1	6.2	10.7	0	12	3	discharge	0	1	4	4	0	1
17	Stage 1	QZ	male	88	170	60	20.76	1	0	0	0	0	0	0	3	1500	0	1	1	0	0	0	0	NA	NA	NA	1	6.1	10.2	0	14	5	transfer	1	0	7	7	0	0
18	Stage 1	QZ	male	54	175	70	NA	1	0	0	0	0	1	0	6	1750	0	1	0	1	0	0	0	NA	1	0	0	6.5	10.1	0	12	3	transfer	1	1	54	54	0	0
19	Stage 1	QZ	male	84	172	60	20.28	1	0	0	0	0	1	1	3	1500	0	1	1	0	0	0	0	24	1	20	1	7.2	10	0	18	2	transfer	1	1	15	11	0	0
20	Stage 1	JH	female	71	165	65	23.87	1	0	0	0	0	0	1	4	1800	0	1	1	0	0	0	1	4	1	56	0	11.1	20	50	31	10	AAD	1	1	3	3	0	0
21	Stage 1	JH	female	87	155	55	22.91	1	0	0	0	1	0	1	6	1500	0	1	1	0	0	0	1	10	1	50	0	13.9	24.9	100	48	9	die	1	1	3	3	1	0
22	Stage 1	JH	male	27	178	115	34.43	1	0	0	0	1	0	0	3	2875	0	0	1	0	0	0	0	NA	NA	NA	0	14	15.2	40	12	2	transfer	1	1	11	0	1	0
23	Stage 1	JH	female	64	155	60	22.91	1	0	1	0	1	0	1	5	1800	1	1	1	0	0	0	0	NA	1	28	0	5.6	8.9	0	18	13	transfer	1	1	12	5	0	0
24	Stage 1	JH	male	36	173	75	25	1	0	0	0	1	0	0	3	2000	0	1	1	0	0	0	0	NA	1	NA	0	8.7	9.9	0	12	7	die	1	1	26	26	1	0
25	Stage 1	JH	female	41	155	55	22.9	1	0	0	0	0	0	0	3	1500	0	0	1	0	0	0	0	NA	NA	NA	0	9.6	19.3	30	5	0	transfer	1	1	4	0	0	0
26	Stage 1	JH	female	44	158	65	26.04	1	0	0	0	0	0	0	3	1800	1	1	1	0	0	0	0	NA	NA	NA	0	5.8	6.3	0	12	2	transfer	1	1	6	NA	0	0
27	Stage 1	JH	female	69	155	55	22.9	1	0	0	0	0	1	1	3	1500	1	1	1	0	0	0	0	NA	1	NA	0	4.7	6.2	0	31	5	discharge	1	1	12	5	0	0
28	Stage 1	JH	male	64	156	54	22.2	1	0	0	0	0	0	0	3	1500	0	1	1	0	0	0	0	NA	1	NA	0	8.9	11.8	0	27	6	AAD	1	1	6	4	1	0
29	Stage 1	JH	female	81	155	50	30.67	1	0	0	0	0	0	1	3	1500	0	1	1	0	0	0	0	NA	1	NA	0	7.4	10	0	32	5	AAD	0	0	7	7	0	1
30	Stage 1	JH	male	52	170	65	22.49	0	0	0	0	0	0	1	4	1800	0	0	1	0	0	0	1	4	1	28	0	6.3	9.6	0	27	4	discharge	1	1	9	0	0	0
31	Stage 1	JH	male	67	170	50	17.3	1	0	0	0	0	1	1	6	1500	0	0	1	0	0	0	1	5	1	33	0	5.8	6.2	0	25	10	transfer	0	0	6	NA	0	1
32	Stage 1	ZJPH	male	54	160	50	19.5	1	1	1	0	1	0	1	5	1467.5	1	1	0	0	1	0	0	NA	NA	NA	1	8.8	12.8	NA	24	NA	AAD	1	1	4	4	0	0
33	Stage 1	ZJPH	male	89	178	45	14.2	0	0	1	0	0	1	1	6	1125	1	1	1	0	0	0	0	NA	NA	NA	0	5.6	7.7	NA	15	13	AAD	1	1	21	0	0	0
34	Stage 1	ZJPH	female	68	165	75	27.5	0	0	1	0	0	1	0	4	1875	0	1	1	0	0	0	0	NA	NA	NA	0	NA	NA	NA	22	7	AAD	1	1	3	NA	0	0
35	Stage 1	ZJPH	male	72	166	50	18.1	1	0	0	0	0	0	0	3	1250	0	1	0	1	0	0	0	NA	NA	30	0	NA	NA	0	8	NA	transfer	1	1	3	3	0	0
36	Stage 1	ZJPH	female	60	156	62	25.48	0	1	0	0	1	0	0	3	1220	1	0	1	0	0	0	0	NA	NA	NA	0	NA	NA	NA	29	NA	AAD	1	1	7	NA	0	0
37	Stage 1	ZJPH	male	70	163	55	20.7	0	1	0	0	0	0	0	4	1650	1	1	1	0	0	0	1	24	2	22	1	8.6	11.2	NA	18	NA	transfer	1	1	13	12	1	0
38	Stage 1	ZJPH	male	38	172	77	26	0	0	1	0	0	1	0	NA	2310	1	1	1	0	0	0	0	NA	NA	NA	0	8.3	10.5	0	13	6	transfer	1	1	54	15	0	0
39	Stage 1	ZJPH	female	79	162	69	26	1	0	0	0	1	0	0	NA	1725	0	0	0	0	0	0	0	NA	2	26	0	5.6	13.8	NA	24	NA	die	1	1	8	8	0	0
40	Stage 1	ZJPH	male	34	170	90	31.14	1	0	0	0	0	0	0	6	2100	0	0	1	0	0	0	0	NA	NA	NA	0	10.6	16.1	54	15	5	discharge	1	1	4	NA	0	0
41	Stage 1	ZJPH	male	82	173	68.7	22.95	1	0	0	0	0	0	0	NA	2061	0	1	0	0	0	0	1	23	1	21.83	0	5.2	7.7	NA	19	6	AAD	1	1	32	32	0	0
42	Stage 1	ZJPH	male	67	170	62	21.45	0	0	0	0	1	0	0	3	1550	0	1	1	0	0	0	1	20	2	24	0	NA	NA	NA	16	6	transfer	1	1	62	NA	0	0
43	Stage 1	ZJPH	female	73	150	55	24.4	1	0	0	0	0	0	1	3	1375	1	0	1	0	0	0	1	NA	2	27	0	NA	NA	NA	NA	NA	transfer	1	1	7	0	0	0
44	Stage 1	ZJPH	male	71	166	55	19.9	1	0	0	1	1	0	0	5	1650	0	0	1	0	0	0	0	NA	NA	NA	0	NA	NA	NA	18	10	discharge	1	1	18	18	0	0
45	Stage 1	ZJPH	male	72	176	75	24	1	0	0	0	1	0	0	6	1980	1	1	0	1	0	0	1	24	2	25	0	9.1	10.5	0	11	8	discharge	1	1	12	NA	0	0
46	Stage 1	ZJPH	female	87	160	72	28	1	0	0	0	1	0	0	5	2160	1	1	1	0	0	0	0	NA	NA	NA	0	10.4	21.4	150	21	11	AAD	1	1	17	NA	0	0
47	Stage 1	ZJPH	male	20	175	115	29	0	0	0	0	0	0	1	3	2875	1	1	0	1	0	0	0	NA	NA	NA	0	16.9	22.9	100	25	NA	AAD	1	1	16	16	0	0
48	Stage 1	ZJPH	male	25	170	65	22.5	0	0	0	0	0	0	1	3	1625	1	1	0	0	1	0	0	NA	NA	NA	0	7.7	7.8	8	16	NA	discharge	1	1	54	54	0	0
49	Stage 1	ZJPH	female	85	155	65	27	1	0	0	0	0	0	0	3	1850	0	1	1	0	0	0	0	30	2	NA	0	7.6	12.4	NA	21	3	discharge	1	1	20	20	0	0
50	Stage 1	ZJPH	female	85	160	72	28	1	0	0	0	0	0	0	5	2100	1	1	0	1	0	0	1	20	2	17.8	0	5.9	8.6	NA	15	4		1	1	90	NA	0	0
51	Stage 1	ZJPH	female	74	163	55.1	20	1	0	0	0	1	0	1	3	1377.5	1	1	0	0	1	0	0	NA	NA	NA	0	4.7	16.7	0	18	NA	die	1	1	3	3	0	0
52	Stage 1	ZJPH	female	70	155	47.9	20	1	0	0	0	1	0	1	6	1530	0	1	0	1	0	0	1	24	1	98	0	7.9	10.3	0	18	1	discharge	1	1	15	15	0	0
53	Stage 1	ZJPH	male	64	NA	NA	NA	1	0	0	0	0	0	0	3	2040	0	1	1	0	0	0	0	NA	NA	NA	1	6.3	6.7	NA	17	1	transfer	1	1	6	NA	0	0
54	Stage 1	ZJPH	male	65	168	70	24.8	1	0	0	0	0	1	0	4	2100	1	1	1	0	0	0	0	NA	NA	NA	0	9.1	11.8	0	NA	NA	AAD	1	1	6	NA	1	0
55	Stage 1	ZJPH	male	67	165	67.5	24.8	1	0	0	1	0	0	0	5	2025	1	1	0	1	0	0	0	NA	NA	NA	1	6.3	11.2	NA	15	7	die	0	1	30	30	0	1
56	Stage 1	ZJPH	male	87	175	70.6	23	1	0	0	0	1	0	0	3	1765	0	1	0	0	1	0	0	NA	NA	NA	0	10.3	14.2	0	28	NA	die	1	1	57	57	0	0
57	Stage 1	ZJPH	male	73	170	79	27	0	0	0	0	0	0	1	3	1975	0	1	0	1	0	0	1	2	2	37	0	10	13	0	16	NA	discharge	1	1	48	48	0	0
58	Stage 1	ZJPH	male	90	176	78	26	1	0	0	0	0	0	0	3	1590	0	0	1	0	0	0	0	NA	NA	NA	0	NA	NA	NA	21	8		1	1	NA	NA	0	0
59	Stage 1	ZJPH	male	85	176	71.5	23.082	0	0	0	1	0	0	0	3	1354	1	0	1	0	0	0	1	12	2	70	0	13.8	5.3	NA	16	3	discharge	1	1	31	21	0	0
60	Stage 1	ZJPH	male	85	160	50	19.531	1	0	0	1	1	0	0	6	1250	1	1	1	0	0	0	1	NA	2	NA	0	6.3	11.2	50	23	NA	die	0	1	28	28	0	1
61	Stage 1	ZJPH	male	81	168	70	25	1	0	1	0	0	0	1	3	1575	0	1	1	0	0	0	0	NA	NA	NA	0	10	15.4	0	20	NA	discharge	1	1	44	44	0	0
62	Stage 1	ZJPH	male	74	164	58	21	1	0	0	0	0	0	0	3	1800	0	1	0	1	0	0	0	NA	NA	NA	0	NA	NA	NA	22	3	discharge	1	1	36	NA	0	0
63	Stage 1	ZJPH	male	64	165	65	24	0	0	1	0	0	0	0	NA	1500	1	1	0	1	0	0	1	22	2	33	1	9.8	11.4	0	NA	NA	discharge	1	1	10	NA	0	0
64	Stage 1	ZJPH	female	73	155	65	27	0	0	0	0	0	0	1	3	1625	1	1	0	0	1	0	0	NA	NA	NA	0	8.2	11.8	0	20	NA	discharge	1	1	19	19	0	0
65	Stage 1	ZJPH	female	94	160	NA	NA	1	0	0	0	1	0	1	4	1650	1	0	1	0	0	0	1	NA	1	15	0	5.1	10.3	0	NA	NA	AAD	1	1	9	NA	0	0
66	Stage 1	ZJPH	female	88	150	37.5	17	1	0	1	0	1	0	1	5	1200	1	1	0	1	0	0	0	NA	NA	NA	0	NA	NA	NA	11	10	AAD	1	1	10	NA	0	0
67	Stage 1	ZJPH	male	52	180	75.1	23	1	0	0	0	1	0	1	3	1877.5	1	0	1	0	0	0	0	NA	NA	NA	0	10.2	27	50	21	NA	die	1	1	18	18	0	0
68	Stage 1	ZJPH	male	48	172	67.8	23.3	1	0	0	0	1	0	0	3	1665	1	1	1	0	0	0	0	NA	NA	NA	0	NA	NA	NA	NA	NA	discharge	1	1	129	NA	0	0
69	Stage 1	ZJPH	female	54	158	40	16.6	1	0	0	0	0	0	0	3	1250	0	1	1	0	0	0	1	4	2	30	0	4.3	12	0	NA	NA		1	1	92	NA	0	0
70	Stage 1	ZJPH	male	61	163	50	19.2	0	0	1	0	0	0	0	3	1250	0	0	1	0	0	0	0	NA	NA	NA	0	NA	NA	NA	15	NA	AAD	1	1	6	NA	0	0
71	Stage 1	ZJPH	female	70	170	80	27	1	0	0	0	0	0	1	3	2000	0	0	0	0	1	0	0	NA	NA	NA	0	14.3	18.1	50	15	NA	discharge	1	1	6	6	0	0
72	Stage 1	ZJPH	female	77	150	31.5	14	1	1	0	0	0	0	1	5	1000	1	1	1	0	0	0	1	24	NA	25	0	6.7	17.1	10	22	2	discharge	1	1	33	33	0	0
73	Stage 1	ZJPH	female	28	157	60	24	1	0	0	0	0	0	1	3	1800	0	1	0	0	1	0	0	NA	NA	NA	0	NA	NA	NA	11	8	die	1	1	10	NA	0	0
74	Stage 1	ZJPH	male	48	170	70	24	1	0	1	0	0	0	0	3	1625	1	1	0	1	0	0	0	NA	1	31	0	6	15.2	0	20	4	transfer	1	1	9	6	0	0
75	Stage 1	ZJPH	male	87	175	75	25	0	0	1	0	0	0	0	3	1750	0	0	0	1	0	0	0	NA	NA	NA	0	10.2	13.9	0	NA	NA	discharge	1	1	20	20	1	0
76	Stage 1	ZJPH	male	68	174	70	23.12	1	0	0	0	1	0	0	3	2100	1	0	1	0	0	0	0	NA	NA	NA	0	7.3	20.4	50	26	NA	discharge	1	1	11	11	0	0
77	Stage 1	ZJPH	male	47	170	65	22.4	1	0	0	0	0	0	1	3	1650	0	1	0	0	1	0	0	NA	NA	NA	0	6.4	9	0	20	NA	discharge	1	1	45	45	0	0
78	Stage 1	ZJPH	male	67	178	80	25	1	0	0	0	1	0	0	3	1832	0	1	0	1	0	0	0	NA	NA	NA	0	4.7	7.2	0	8	NA	discharge	1	1	28	28	0	0
79	Stage 1	ZJPH	female	52	155	60	25	0	0	1	0	0	0	0	NA	1250	1	1	1	0	0	0	0	NA	NA	NA	0	NA	NA	NA	NA	NA	transfer	1	1	19	19	0	0
80	Stage 2	ZJPH	male	52	162	68	26	0	1	1	0	0	0	0	3	1467.5	0	1	0	0	1	0	0	NA	NA	NA	0	NA	NA	NA	21	NA	AAD	1	1	9	9	0	0
81	Stage 2	ZJPH	male	83	165	45	16.6	1	0	0	0	0	0	1	3	1573.5	1	1	0	0	1	0	0	NA	NA	NA	0	6	8.7	0	45	NA	transfer	1	1	120	120	0	0
82	Stage 2	ZJPH	male	63	170	NA	NA	0	0	1	0	0	0	0	3	1650	0	0	1	0	0	0	1	12	2	68	0	7.9	12.8	0	12	NA	AAD	1	1	11	1	0	0
83	Stage 2	ZJPH	female	88	168	60	21	1	0	0	0	0	0	1	3	1500	0	1	0	0	0	0	0	NA	NA	33	0	NA	NA	NA	NA	NA	discharge	1	1	43	43	1	0
84	Stage 2	ZJPH	male	61	172	70	24	1	0	0	0	0	0	0	3	1695	0	1	0	0	1	0	0	NA	NA	NA	0	NA	NA	NA	11	NA	transfer	1	1	44	44	0	0
85	Stage 2	ZJPH	female	62	158	75	31.25	0	0	1	1	0	0	0	3	1265	0	1	0	1	0	0	0	NA	NA	NA	0	6.1	11.5	0	21	NA	AAD	1	1	51	51	0	0
86	Stage 2	ZJPH	male	75	170	67	23	1	0	0	0	0	0	0	3	1675	0	1	0	0	1	0	0	NA	NA	NA	0	5.4	9.2	0	NA	NA	discharge	1	1	11	65	0	0
87	Stage 2	ZJPH	female	77	155	49	20	1	0	0	0	0	0	0	3	1225	0	1	0	0	1	0	0	NA	NA	NA	0	3.5	17.9	10	NA	NA	discharge	1	1	16	16	0	0
88	Stage 2	ZJPH	female	59	150	41	18	1	0	0	0	0	0	1	3	1025	0	1	0	1	0	0	0	NA	NA	NA	0	7.1	9.1	0	13	NA	AAD	1	1	28	28	0	0
89	Stage 2	ZJPH	female	74	158	50	20	1	0	0	0	0	0	0	3	1242.5	0	1	0	0	1	0	0	NA	NA	NA	0	5	9.2	0	12	NA	discharge	1	1	11	11	0	0
90	Stage 2	ZJPH	female	66	160	65	25	1	0	0	0	0	0	0	3	1625	1	1	0	0	1	0	0	NA	NA	NA	0	8	17.6	0	28	NA	AAD	1	1	7	7	0	0
91	Stage 2	ZJPH	female	33	173	47	16.2	0	0	0	0	0	0	1	3	1607.5	1	1	0	0	1	0	0	NA	NA	NA	0	4.6	6.9	0	5	NA	discharge	1	1	32	32	0	0
92	Stage 2	ZJPH	male	90	175	60	20	0	0	0	0	0	0	0	3	1500	1	1	0	0	1	0	0	NA	NA	NA	0	7.6	11.5	0	23	NA	die	0	1	26	26	0	1
93	Stage 2	ZJPH	male	76	170	60	20.7	1	0	0	0	0	0	1	3	1650	0	0	0	0	1	0	0	NA	NA	NA	0	3.5	11.4	4	11	NA	discharge	1	1	17	0	0	0
94	Stage 2	ZJPH	male	72	172	100	34	0	0	0	0	1	0	0	4	1695	1	1	0	0	1	0	0	NA	NA	NA	0	9.3	18.9	0	17	NA	discharge	1	1	5	5	0	0
95	Stage 2	ZJPH	male	58	170	75	25.9	1	0	0	0	0	0	0	3	1650	0	1	0	0	1	0	0	NA	NA	NA	0	8.2	9.7	0	NA	NA	AAD	1	1	11	11	0	0
96	Stage 2	ZJPH	male	44	168	65	23	0	0	0	0	0	0	0	3	1655	1	1	0	0	1	0	0	NA	NA	NA	0	5	10	0	10	NA	discharge	1	1	47	47	0	0
97	Stage 2	ZJPH	male	60	170	92	31	1	0	0	0	0	0	0	3	1667.5	0	1	0	0	1	0	0	NA	NA	NA	0	7.4	10.4	0	22	NA	discharge	1	1	56	56	0	0
98	Stage 2	ZJPH	male	71	167	57	20	1	0	0	0	0	0	0	3	1582.5	1	1	0	0	1	0	0	NA	NA	NA	0	12.4	20.4	0	20	NA	discharge	1	1	9	9	0	0
99	Stage 2	ZJPH	male	86	170	52	18	1	0	0	0	0	0	0	3	1650	1	1	0	1	0	0	0	NA	NA	NA	0	12.9	16.3	0	11	NA	AAD	1	1	14	14	0	0
100	Stage 2	ZJPH	male	55	167	61	21	1	0	0	0	0	0	0	3	1575	0	0	0	0	1	0	0	NA	NA	NA	0	7.2	9.1	16	3	NA	discharge	1	1	5	5	0	0
101	Stage 2	ZJPH	male	34	167	52	19.2	1	0	0	0	0	0	0	3	1507.5	0	1	0	1	0	0	0	NA	NA	NA	0	5.2	8.9	0	NA	NA	discharge	1	1	57	57	0	0
102	Stage 2	ZJPH	female	89	160	55	21	1	0	0	0	0	0	0	3	1375	0	1	0	0	1	0	0	NA	2	NA	0	5	7.8	0	NA	NA	AAD	1	1	27	27	0	0
103	Stage 2	ZJPH	male	26	180	50	15	1	0	0	0	0	0	1	3	1250	0	1	0	0	1	0	0	NA	NA	NA	0	6.9	10.7	0	NA	NA	AAD	1	1	8	8	0	0
104	Stage 2	ZJPH	male	55	150	71	33	1	0	0	0	0	0	0	3	1775	1	1	0	0	1	0	0	NA	NA	NA	0	4.7	13.7	0	NA	NA	AAD	1	1	22	22	0	0
105	Stage 2	ZJPH	male	55	173	68	22	1	0	0	0	0	0	0	3	1700	0	1	0	0	0	0	0	NA	NA	NA	0	9.3	17.3	50	NA	NA	die	1	1	9	9	0	0
106	Stage 2	ZJPH	female	80	148	45	20	1	0	0	0	0	0	0	3	1037.5	0	1	0	0	1	0	0	NA	NA	NA	0	7	9.1	0	NA	NA	die	0	1	13	13	0	1
107	Stage 2	ZJPH	male	85	173	70	34	1	0	0	0	0	0	0	3	1750	0	1	0	0	1	0	0	NA	NA	NA	0	5.4	7.8	0	NA	NA	discharge	1	1	68	68	0	0
108	Stage 2	ZJPH	male	59	182	105	31	1	0	0	0	0	0	0	3	1922.5	0	1	0	0	1	0	0	NA	NA	NA	0	14.3	18.2	0	13	NA	discharge	1	1	30	30	0	0
109	Stage 2	ZJPH	male	80	158	57.2	22.9	1	0	0	0	0	0	0	3	1250	0	0	0	1	0	0	0	NA	NA	NA	0	6.5	6.5	0	10	NA	discharge	1	1	16	NA	0	0
110	Stage 1	ZJTCM	male	52	175	75	24.4	1	0	0	1	0	0	0	6	1875	0	1	1	0	0	0	1	24	2	40	0	5.3	6.4	0	5	1	transfer	1	1	9	9	0	0
111	Stage 1	ZJTCM	male	81	175	78	25.46	1	0	0	0	0	0	0	6	1950	1	1	0	1	0	0	0	NA	NA	NA	0	27.3	18.8	60	35	11	transfer	1	1	17	15	0	0
112	Stage 1	ZJTCM	male	91	158	50	31.6	1	0	1	0	0	0	1	6	1250	0	1	1	0	0	0	1	8	2	60	0	6.2	8	0	19	4		1	1	NA	NA	0	0
113	Stage 1	ZJTCM	female	44	160	55	21.48	1	1	1	0	0	1	1	4	1375	0	1	1	0	0	0	1	7	1	54.5	0	6.2	8.9	0	12	2		1	1	NA	NA	0	0
114	Stage 1	ZJTCM	male	82	175	70	22.85	1	0	0	0	0	0	1	4	1750	1	1	0	1	0	0	0	NA	NA	NA	0	5	8	0	23	4	transfer	1	1	3	3	0	0
115	Stage 1	ZJTCM	male	90	170	65	22.5	1	0	0	0	0	0	1	3	1625	0	1	1	0	0	0	1	8	2	46	0	5	10	0	11	2	die	0	1	20	20	1	1
116	Stage 1	ZJTCM	male	81	185	75	21.91	1	0	1	1	0	0	0	NA	1875	0	1	0	1	0	0	0	NA	NA	NA	1	5	10	6	16	7	die	1	0	31	31	0	0
117	Stage 1	ZJTCM	male	71	170	65	22.5	1	1	1	0	0	0	1	3	1625	0	1	1	0	0	0	1	8	2	46	0	5	10	0	10	0		1	1	NA	NA	0	0
118	Stage 1	ZJTCM	male	85	165	60	22	1	1	0	0	0	0	1	3	1500	0	1	1	0	0	0	0	NA	NA	NA	0	5	10	0	11	1		1	1	NA	NA	0	0
119	Stage 1	ZJTCM	male	87	165	60	22	1	0	0	0	0	0	1	3	1500	0	1	1	0	0	0	1	8	2	50	0	5	10	0	12	1		1	1	NA	NA	0	0
120	Stage 1	ZJTCM	male	66	170	65	22.5	1	0	0	0	0	0	1	3	1625	1	1	1	0	0	0	0	NA	NA	NA	0	5	10	0	15	2	die	1	0	41	41	1	0
121	Stage 1	ZJTCM	female	65	160	60	23.4	1	0	0	0	0	0	1	3	1500	1	1	1	0	0	0	0	NA	NA	NA	0	5	15	6	21	9	transfer	1	1	11	NA	0	0
122	Stage 1	ZJTCM	male	61	170	65	22.5	1	0	0	0	0	0	1	5	1625	0	1	0	1	0	0	1	8	1	46	0	5	10	0	14	4	discharge	1	1	58	58	0	0
123	Stage 1	ZJTCM	female	73	155	50	20.8	0	1	0	0	0	0	0	5	1250	1	1	0	1	0	0	0	NA	NA	NA	0	11	14	0	11	5	transfer	1	1	3	3	0	0
124	Stage 1	ZJTCM	male	71	172	70	22.6	1	0	0	0	0	0	1	3	1750	0	1	1	0	0	0	1	8	2	43	0	0	10	0	10	1		1	1	NA	NA	0	0
125	Stage 1	ZJTCM	female	76	160	50	19.5	1	0	0	0	0	0	1	5	1250	0	1	1	0	0	0	1	10	2	24	0	5	10	0	17	9	transfer	1	1	26	22	0	0
126	Stage 1	ZJTCM	male	91	170	65	22.5	1	0	0	0	0	0	1	4	1625	0	1	1	0	0	0	1	NA	2	46	0	5	10	0	11	1		1	1	NA	NA	0	0
127	Stage 1	ZJTCM	male	62	170	65	22.5	1	0	0	0	1	0	1	3	1625	1	1	0	0	1	0	0	NA	NA	NA	0	11	14	6	29	13	transfer	1	1	22	22	1	0
128	Stage 1	ZJTCM	male	63	175	70	22.8	0	0	1	0	0	0	1	3	1750	0	1	1	0	0	0	1	12	2	43	0	5	10	0	15	4	transfer	1	1	16	16	0	0
129	Stage 1	ZJTCM	female	83	175	70	22.8	0	0	1	0	0	0	1	3	1750	0	1	1	0	0	0	1	10	2	43	0	5	10	0	19	4	transfer	1	1	7	7	0	0
130	Stage 2	ZJTCM	male	71	170	45	15.6	1	0	0	1	0	1	1	NA	1625	1	1	0	1	0	0	0	NA	NA	NA	0	5	10	0	15	4	die	0	0	4	4	0	1
131	Stage 2	ZJTCM	male	69	170	55	19	0	1	0	0	0	0	1	6	1625	0	1	0	1	0	0	0	NA	NA	NA	0	5	10	0	6	1	transfer	1	1	5	5	0	0
132	Stage 2	ZJTCM	male	69	175	70	23	0	1	0	0	0	0	1	5	1750	0	1	1	0	0	0	1	6	2	43	0	5	10	0	14	3	transfer	1	1	20	20	0	0
133	Stage 2	ZJTCM	female	19	160	50	19	1	0	0	1	0	0	0	5	1250	0	1	0	1	0	0	0	NA	NA	NA	0	5	10	0	17	8	AAD	1	1	6	6	0	0
134	Stage 2	ZJTCM	female	79	155	45	18	1	0	0	1	0	0	1	6	1125	0	1	1	0	0	0	1	6	2	65	0	5	10	0	19	5	die	0	0	5	5	0	1
135	Stage 2	ZJTCM	male	38	180	80	25	0	0	1	0	0	0	1	3	1875	0	1	0	1	0	0	0	NA	NA	NA	0	5	10	0	15	4	transfer	1	1	12	10	0	0
136	Stage 2	ZJTCM	female	53	160	45	17.5	1	0	0	1	1	0	1	5	1125	0	1	0	1	0	0	1	NA	2	66	0	5	15	10	14	5	transfer	1	1	6	6	0	0
137	Stage 2	ZJTCM	female	78	160	50	19.5	1	0	0	0	0	0	1	NA	1250	0	1	0	1	0	0	0	NA	NA	NA	0	5	12	0	20	6	transfer	1	1	9	9	0	0
138	Stage 2	ZJTCM	male	65	175	70	22.8	1	0	0	0	0	0	1	4	1750	0	1	1	0	0	0	1	12	2	42	0	5	10	0	10	0	transfer	1	1	26	26	0	0
139	Stage 1	NB	female	63	155	60	24.9	1	0	0	0	0	0	1	4	1500	0	1	1	0	0	0	1	23	1	33	0	5.2	7.1	0	18	3	transfer	1	1	9	5	0	0
140	Stage 1	NB	male	40	170	65	22.5	0	0	1	0	0	0	0	3	1950	0	1	1	0	0	0	0	NA	NA	NA	0	5.3	7.9	NA	17	3	discharge	1	1	12	8	0	0
141	Stage 1	NB	male	74	172	68	22.9	1	0	0	0	0	0	1	4	1850	0	1	1	0	0	0	1	10	1	25	0	6.3	12.9	NA	28	4		1	1	NA	23	0	0
142	Stage 1	NB	female	71	159	68	26.9	0	0	1	0	0	0	1	4	1700	0	1	1	0	0	0	0	NA	NA	NA	0	6	10.3	NA	27	4	discharge	1	1	14	9	1	0
143	Stage 1	NB	male	61	176	68	24.5	1	0	0	0	0	0	1	3	1875	0	1	1	0	0	0	0	NA	NA	NA	0	6.2	7.5	NA	19	4	AAD	0	1	10	10	1	1
144	Stage 1	NB	female	57	157	62	25	1	0	0	0	0	0	1	3	1550	0	1	1	0	0	0	0	NA	NA	NA	0	9	9.9	NA	24	2	discharge	1	1	10	4	0	0
145	Stage 1	NB	female	84	155	70	29.1	1	0	0	0	1	1	1	3	1875	0	1	1	0	0	0	0	NA	NA	NA	0	6.3	10	NA	14	2	AAD	0	1	20	17	0	1
146	Stage 1	NB	female	86	156	50	20.5	1	0	0	1	1	0	1	3	1250	1	1	1	0	0	0	0	NA	NA	NA	0	6.1	11.4	NA	31	4	AAD	0	1	15	15	0	1
147	Stage 1	NB	female	62	160	70	27.3	0	0	1	0	0	0	0	3	1925	0	1	1	0	0	0	0	NA	1	NA	0	7.4	11.3	NA	27	6		1	1	NA	NA	0	0
148	Stage 1	NB	female	20	160	85	33.2	1	0	0	0	0	1	0	3	2337.5	0	1	0	0	0	0	0	NA	1	NA	0	7.8	11.2	NA	33	NA	discharge	1	1	4	4	0	0
149	Stage 1	NB	male	76	174	76	25.1	1	0	0	0	0	0	1	3	2090	0	1	1	0	0	0	1	6	1	26	0	7.2	11.1	NA	16	3	AAD	0	1	9	9	0	1
150	Stage 1	NB	male	78	178	70	22	0	0	1	1	0	1	0	NA	1925	0	1	1	0	0	0	1	32	1	29	0	6.8	10	NA	15	4	discharge	1	1	19	3	1	0
151	Stage 1	NB	male	59	175	75	24.5	1	0	0	1	0	0	1	3	2062.5	1	1	1	0	0	0	1	NA	1	27	0	6.4	8.6	NA	19	7	transfer	1	1	24	17	0	0
152	Stage 1	NB	male	77	172	72	24	1	0	0	0	1	0	1	4	1980	1	1	1	0	0	0	0	NA	NA	NA	0	6.5	18.1	10	32	11	AAD	0	1	16	7	0	1
153	Stage 1	NB	female	77	160	70	29.3	0	0	1	0	0	0	0	3	1925	0	1	1	0	0	0	0	NA	1	NA	0	6	11	0	19	10	discharge	1	1	27	NA	0	0
154	Stage 1	NB	female	70	160	65	25.4	1	0	0	1	0	0	1	3	1787.5	1	1	1	0	0	0	0	NA	NA	NA	0	11	20.4	16	23	12	AAD	0	1	6	6	0	1
155	Stage 1	NB	male	49	174	75	24.7	0	0	1	0	0	0	1	3	2062.5	0	1	1	0	0	0	0	NA	NA	NA	0	8.1	11.6	NA	13	3	discharge	1	1	26	4	0	0
156	Stage 1	NB	male	63	173	70	23.4	1	0	0	0	0	0	0	3	1925	0	1	1	0	0	0	1	12	1	29	0	7.2	11.1	NA	NA	NA	transfer	1	1	6	4	0	0
157	Stage 1	NB	male	44	170	75	26	0	0	1	0	0	0	1	3	2062.5	0	1	1	0	0	0	1	13	1	26	0	7.2	11.4	NA	20	5	discharge	1	1	50	10	0	0
158	Stage 1	NB	male	33	172	65	22	0	0	1	0	0	0	1	3	1787.5	0	1	1	0	0	0	0	NA	1	NA	0	7.5	11.2	NA	7	6	transfer	1	1	5	5	0	0
159	Stage 1	NB	female	70	163	68	25.6	1	0	0	1	0	1	1	4	1870	0	1	1	0	0	0	1	19	1	29	0	7.5	10.6	NA	30	NA	transfer	1	1	9	6	0	0
160	Stage 1	NB	male	62	172	72	24	0	0	1	0	0	0	0	3	1980	0	1	1	0	0	0	0	NA	NA	NA	0	8	9.4	NA	23	4	transfer	1	1	15	11	1	0
161	Stage 1	NB	male	66	175	80	26	1	0	0	0	1	0	0	3	2200	0	1	1	0	0	0	1	NA	1	50	0	11.1	15	NA	28	5		1	1	NA	NA	0	0
162	Stage 1	NB	male	46	170	70	24	0	1	0	0	0	0	1	3	1925	0	0	1	0	0	0	1	13	1	29	0	6	10	NA	17	6	transfer	1	1	10	0	0	0
163	Stage 1	NB	male	72	170	72	24.9	0	0	1	0	0	0	0	3	1920	0	1	1	0	0	0	0	NA	NA	NA	0	6.3	9.9	NA	19	6	discharge	1	1	12	6	0	0
164	Stage 1	NB	male	68	175	75	24.5	1	0	0	0	0	0	1	3	2062.5	0	1	1	0	0	0	1	38	1	NA	0	6.5	8	NA	21	5	discharge	1	1	10	6	0	0
165	Stage 1	NB	male	68	178	80	25.2	0	0	1	0	0	0	0	3	2200	0	1	1	0	0	0	0	NA	NA	NA	0	6.6	11.1	NA	15	5		1	1	NA	NA	0	0
166	Stage 1	NB	male	68	174	72	23.8	1	0	0	0	0	0	1	3	1980	0	1	1	0	0	0	0	NA	NA	NA	0	7.8	14.5	NA	14	7		1	1	NA	NA	0	0
167	Stage 1	NB	male	81	173	72	24	1	0	0	0	0	0	1	4	1980	0	0	1	0	0	0	1	18	1	28	0	8.7	10.7	NA	32	5	AAD	1	1	12	6	0	0
168	Stage 1	NB	male	29	176	75	24.2	0	0	1	0	0	0	1	3	2062	1	1	1	0	0	0	0	NA	NA	NA	0	7.1	11.6	NA	21	7		1	1	NA	NA	0	0
169	Stage 1	NB	male	40	172	70	23.6	0	0	1	0	0	0	0	3	1925	0	1	1	0	0	0	0	NA	NA	NA	0	6	11.6	NA	15	4	discharge	1	1	7	7	0	0
170	Stage 1	NB	male	59	172	70	23.6	0	0	1	0	1	0	0	3	1925	0	1	1	0	0	0	0	NA	NA	NA	0	9.1	14.6	NA	25	5		1	1	NA	NA	0	0
171	Stage 1	NB	female	76	159	52	21	1	0	0	0	0	0	1	4	1430	0	1	1	0	0	0	1	19	1	38	0	8	10.2	NA	35	6	AAD	1	1	6	6	0	0
172	Stage 2	NB	female	49	160	55	21.5	0	0	1	0	0	0	1	3	1375	0	1	1	0	0	0	1	20	1	36	0	5.7	11.4	0	22	6	discharge	1	1	9	5	1	0
173	Stage 2	NB	female	32	156	55	22.6	1	0	0	0	0	0	0	3	1220	0	0	1	0	0	0	0	NA	NA	NA	0	5.5	15.4	NA	4	NA	transfer	1	1	4	NA	0	0
174	Stage 2	NB	male	39	173	85	28.4	1	0	0	0	1	0	1	3	1717.5	0	1	0	1	0	0	0	NA	NA	NA	0	7.1	13.3	4	14	9	AAD	1	0	66	56	1	0
175	Stage 2	NB	male	82	172	74	28.6	1	0	0	0	0	1	1	4	1695	0	1	1	0	0	0	1	6	1	18	0	6.5	7.3	NA	12	2	discharge	1	1	7	4	0	0
176	Stage 2	NB	male	39	176	76	24.5	0	0	1	0	0	0	0	3	1787.5	1	1	0	0	0	0	1	17	NA	17	0	10.6	16.9	0	23	11	discharge	1	1	40	40	0	0
177	Stage 2	NB	male	82	170	66	22.84	1	0	0	0	0	0	1	4	1650	0	1	0	0	0	0	1	10	1	30	0	8.5	11	0	29	3	transfer	1	1	11	11	0	0
178	Stage 2	NB	female	76	160	62	24.2	1	0	0	0	1	0	1	4	1310	0	1	1	0	0	0	0	NA	NA	NA	0	12.1	18.6	14	26	NA	AAD	0	1	3	3	0	1
179	Stage 2	NB	female	82	158	60	24	1	0	0	0	0	0	1	4	1310	0	1	1	0	0	0	0	NA	NA	NA	0	8.4	15.3	6	25	NA	AAD	0	1	32	32	0	1
180	Stage 2	NB	female	49	155	55	22.89	0	0	1	0	0	0	0	3	1197.5	0	1	1	0	0	0	1	28	1	42	0	6	12.6	0	10	3	transfer	1	1	7	3	1	0
181	Stage 2	NB	male	54	173	72	24.1	0	0	1	0	0	0	1	3	1717.5	0	1	1	0	0	0	1	NA	1	29	0	5	10.6	0	16	4	transfer	1	1	5	4	1	0
182	Stage 2	NB	female	27	176	73	23.6	0	0	1	0	0	0	1	3	1787.5	1	1	1	0	0	0	1	NA	1	28	0	7.2	8	0	19	8	discharge	1	1	18	6	1	0
183	Stage 2	NB	female	51	160	65	25.4	0	0	1	0	0	0	1	3	1310	0	1	1	0	0	0	0	NA	NA	NA	0	13.5	18.3	12	24	4		1	1	NA	NA	1	0
184	Stage 2	NB	male	51	174	72	23.8	1	0	0	0	0	0	1	3	1742.5	0	1	1	0	0	0	0	NA	NA	NA	0	12.1	12.8	NA	6	1	discharge	1	1	13	4	0	0
185	Stage 2	NB	male	31	172	78	26	0	0	1	0	0	0	1	3	1695	0	1	0	0	0	0	0	NA	1	NA	0	6.8	7.3	NA	21	4	discharge	1	1	19	11	0	0
186	Stage 2	NB	female	70	150	50	22.2	0	0	1	0	0	0	1	3	1082.5	0	1	1	0	0	0	1	10	1	46	0	9.1	16.5	8	28	4	discharge	1	1	12	6	1	0
187	Stage 2	NB	male	40	175	67	21.9	1	0	0	0	1	0	1	3	1765	0	1	1	0	0	0	0	NA	NA	NA	0	9.1	14.5	NA	26	7	die	0	1	14	14	0	1
188	Stage 2	NB	male	73	170	60	20.7	1	0	0	0	0	0	1	4	1650	1	1	1	0	0	0	0	NA	NA	NA	0	4.6	12.2	0	16	7	transfer	1	1	7	3	0	0
189	Stage 2	NB	female	38	162	55	20.9	1	0	0	0	0	0	1	3	1355	1	1	1	0	0	0	0	NA	NA	NA	0	5.9	8.2	NA	24	9	discharge	1	1	26	21	0	0
190	Stage 2	NB	female	70	153	77	32.9	1	0	0	0	0	1	1	4	1380	1	1	1	0	0	0	1	11	1	36	0	5.5	7.9	0	11	6	transfer	1	1	8	2	0	0
191	Stage 2	NB	male	40	175	68	22.2	1	0	0	0	0	0	1	3	1765	0	1	0	1	0	0	0	NA	NA	NA	0	5.5	16.2	0	7	1	transfer	1	1	7	0	0	0
192	Stage 2	NB	male	74	173	75	25.1	0	0	1	0	0	0	1	3	1717.5	1	1	1	0	0	0	0	NA	NA	NA	0	7.6	11.2	NA	NA	NA	transfer	1	1	5	3	0	0
193	Stage 2	NB	male	79	174	72	24.4	1	0	0	0	0	0	1	3	1742.5	0	0	1	0	0	0	1	34	1	17.2	0	5.5	13.2	4	15	2	discharge	0	1	8	NA	0	1
194	Stage 2	NB	female	70	162	62	23.6	1	0	0	0	0	0	1	4	1355	0	1	1	0	0	0	0	NA	NA	NA	0	5.7	6.5	NA	16	5	transfer	1	1	34	34	0	0
195	Stage 2	NB	female	67	160	50	19.5	1	0	0	0	0	0	0	3	1310	1	1	1	0	0	0	1	22	1	38	0	6.5	9.8	0	28	7	transfer	1	1	13	6	0	0
196	Stage 2	NB	male	69	173	76	25.4	1	0	0	0	0	0	1	3	1717.5	0	1	1	0	0	0	0	NA	1	NA	0	9.9	17.4	24	23	7	transfer	1	1	17	7	0	0
197	Stage 2	NB	male	53	170	68	23.5	1	0	0	0	0	1	1	3	1650	0	1	1	0	0	0	0	14	1	30.3	0	6.8	9.2	NA	32	2	transfer	1	1	9	6	0	0
198	Stage 1	SX	male	67	170	70	24.2	0	0	1	1	0	0	0	3	1750	1	1	0	1	0	0	1	12	1	14.3	0	4	7	0	16	8	transfer	1	1	23	4	0	0
199	Stage 1	SX	male	44	170	65	22.4	0	0	1	1	0	0	1	5	1625	1	1	0	1	0	0	0	NA	NA	0	0	5.12	8	0	11	13	discharge	1	1	9	1	0	0
200	Stage 1	SX	male	24	170	60	20.8	0	0	1	0	0	0	0	3	1500	1	1	0	1	0	0	0	NA	NA	0	0	5.6	7.1	0	11	8	discharge	1	1	25	15	0	0
201	Stage 1	SX	female	80	160	50	20	0	0	1	0	0	0	0	3	1250	0	1	0	1	0	0	1	24	1	20	0	8	10	40	27	8	AAD	1	0	16	13	0	0
202	Stage 1	SX	male	22	170	60	21	1	0	0	0	0	0	0	3	1250	1	1	0	1	0	0	0	NA	1	0	0	6.7	6.9	0	10	8	transfer	1	1	26	19	0	0
203	Stage 1	SX	female	83	160	50	19.5	1	0	0	0	0	1	1	4	1250	1	1	1	0	0	0	1	9	1	40	0	8	10	0	10	2	transfer	1	1	11	8	0	0
204	Stage 1	SX	female	69	160	50	19.5	1	0	0	0	0	0	0	3	1250	1	1	1	0	0	0	0	NA	1	NA	0	7.2	9.7	0	12	4	transfer	1	1	8	3	0	0
205	Stage 1	SX	male	87	170	60	20.7	1	0	0	0	0	0	0	3	1500	0	1	1	0	0	0	0	NA	1	0	0	7.8	9.7	0	12	3	transfer	1	1	26	17	0	0
206	Stage 1	SX	male	61	170	60	20.7	1	0	0	0	0	0	0	3	1500	0	1	1	0	0	0	1	12	1	33	0	8	11	0	12	2		1	1	NA	NA	0	0
207	Stage 1	SX	male	63	170	60	20.7	1	0	0	0	0	0	0	3	1500	0	1	0	1	0	0	0	NA	1	0	0	8	10	0	11	5	AAD	0	0	9	9	0	1
208	Stage 1	SX	male	27	175	60	19.6	0	0	1	0	1	0	0	3	1500	1	1	0	1	0	0	0	NA	1	0	0	8	10	0	14	10	die	0	0	18	18	0	1
209	Stage 1	SX	male	37	170	60	20.8	0	0	1	0	0	0	0	3	1500	1	1	0	1	0	0	0	NA	1	0	0	6.37	10	0	11	7	AAD	0	0	20	20	0	1
210	Stage 1	SX	female	53	160	50	19.5	1	0	0	0	0	0	0	3	1250	0	1	0	1	0	0	0	NA	1	0	0	8	10	0	3	2	discharge	1	1	14	10	0	0
211	Stage 1	SX	male	78	170	60	20.8	1	0	0	0	0	0	0	3	1500	0	1	1	0	0	0	0	NA	1	0	0	8	10	0	18	6	discharge	1	1	22	18	0	0
212	Stage 1	SX	male	49	170	60	20.1	1	0	0	1	0	0	1	3	1500	0	1	1	0	0	0	0	NA	1	0	0	8	10	0	10	5	discharge	1	1	8	7	0	0
213	Stage 1	SX	female	83	160	50	19.5	1	0	0	1	0	0	0	3	1250	0	1	1	0	0	0	0	NA	1	NA	0	8	10	0	10	3	discharge	1	1	10	10	0	0
214	Stage 1	SX	male	27	170	60	20.7	0	0	1	0	0	0	0	3	1500	0	1	0	1	0	0	0	NA	1	0	0	8	10	0	15	5	discharge	1	1	23	19	0	0
215	Stage 1	SX	male	71	170	60	20.7	1	0	0	0	0	0	0	3	1500	1	1	0	1	0	0	0	NA	1	0	0	8	10	0	24	18	die	0	0	10	10	0	1
216	Stage 1	SX	male	73	170	60	20.7	0	1	0	1	0	0	0	3	1500	0	1	1	0	0	0	0	NA	1	0	0	5.9	10	0	10	3	transfer	1	1	15	4	0	0
217	Stage 1	SX	female	69	160	50	19.5	1	0	0	1	0	0	0	3	250	0	1	1	0	0	0	1	18	1	40	0	8	10	0	21	8	AAD	1	1	8	8	0	0
218	Stage 1	SX	male	77	170	60	20.7	0	0	1	0	0	0	0	3	1500	0	1	1	0	0	0	0	NA	1	NA	0	8	10	0	24	8	die	0	0	32	22	0	1
219	Stage 1	SX	female	67	160	60	23.4	1	0	0	0	0	0	0	3	1500	0	1	0	1	0	0	0	NA	1	0	0	7.98	10	NA	20	6	discharge	1	1	42	30	0	0
220	Stage 1	SX	female	66	160	50	19.5	0	0	1	0	0	0	0	3	1250	0	1	0	0	1	0	0	NA	1	0	0	8	10	0	21	11	transfer	1	1	28	17	0	0
221	Stage 2	SX	female	92	160	50	19.53	1	0	0	1	0	0	0	3	1250	1	1	0	1	0	0	0	5	1	40	0	9.1	11.9	0	22	4	AAD	0	1	18	18	0	1
222	Stage 2	SX	male	33	170	65	22.5	0	0	1	0	0	0	0	3	1500	0	1	0	1	0	0	0	NA	NA	NA	0	7.2	9	0	7	4	transfer	1	1	2	14	1	0
223	Stage 2	SX	male	40	171.5	60	20.5	0	1	1	0	0	0	0	4	1500	1	1	0	1	0	0	0	NA	NA	NA	0	11.2	12.3	0	14	4	transfer	0	1	5	5	0	1
224	Stage 2	SX	male	62	170	65	22.5	0	0	0	0	0	0	0	3	1500	0	1	1	0	0	0	0	NA	NA	NA	0	6	10	0	19	4	transfer	1	1	15	14	1	0
225	Stage 2	SX	male	70	170	65	22.5	0	1	1	0	0	0	0	6	1500	1	1	1	0	0	0	0	NA	NA	NA	0	9.4	10.3	0	28	13	transfer	1	1	13	3	1	0
226	Stage 2	SX	female	67	160	60	23.5	0	1	1	0	0	1	0	3	1250	0	1	1	0	0	0	0	NA	NA	NA	0	6.5	9.6	0	30	13		1	1	NA	6	0	0
227	Stage 2	SX	male	77	170	65	22.5	1	0	0	0	1	0	1	6	1500	1	1	1	0	0	0	0	NA	NA	NA	0	7.2	10.1	0	26	16	AAD	0	1	5	5	1	1
228	Stage 2	SX	male	73	170	60	20.7	1	0	0	0	0	0	0	4	1500	1	1	1	0	0	0	0	NA	NA	NA	0	4.77	13.4	0	23	10	transfer	1	1	17	12	1	0
229	Stage 2	SX	female	64	160	60	23.4	0	0	0	0	0	0	0	3	1250	0	1	1	0	0	0	0	NA	NA	NA	0	6.9	9.4	0	18	5	transfer	1	1	30	NA	0	0
230	Stage 2	SX	male	72	170	60	20.7	1	0	0	0	0	0	0	4	1500	0	1	1	0	0	0	0	NA	NA	NA	0	7	10	0	17	8	transfer	1	1	18	13	1	0
231	Stage 2	SX	male	78	170	60	20.7	1	0	0	0	0	0	0	4	1500	0	1	1	0	0	0	1	4	1	33	0	6.3	13.5	0	22	6	transfer	1	1	9	7	0	0
232	Stage 2	SX	male	45	175	65	21.2	0	0	0	0	0	0	0	3	1500	0	1	1	0	0	0	0	NA	NA	NA	0	6.6	9.1	0	20	4	transfer	1	1	13	12	0	0
233	Stage 1	QZ	male	83	175	70	22.86	1	0	0	0	0	0	1	3	1750	1	1	1	0	0	0	1	24	1	17.14	1	7.5	9.5	0	11	5	discharge	1	1	19	11	0	0
234	Stage 1	QZ	male	83	172	60	20.28	1	0	0	0	0	1	1	4	1500	1	1	1	0	0	0	1	24	1	20	1	8.1	10	0	23	10	transfer	1	1	10	10	0	0
235	Stage 1	QZ	female	70	158	60	24.03	0	0	1	0	0	0	0	3	1500	1	1	1	0	0	0	1	24	1	20	1	6.5	8.5	0	12	3	discharge	1	1	18	18	0	0
236	Stage 1	QZ	male	68	175	75	24.49	1	0	0	0	1	0	0	3	1875	1	1	1	0	0	0	1	24	1	16	1	6.5	10	0	24	12	transfer	1	1	20	20	0	0
237	Stage 1	QZ	male	77	163	50	18.8	1	0	0	0	0	0	0	3	1500	0	1	0	1	0	0	0	NA	NA	NA	1	6.7	9.6	0	12	3	transfer	1	1	11	22	0	0
238	Stage 1	QZ	male	74	170	60	20.76	1	0	0	1	0	0	0	5	1500	1	1	0	0	1	0	0	NA	NA	NA	1	7.2	10.9	0	23	3	transfer	1	1	40	20	0	0
239	Stage 1	QZ	male	56	170	65	22.49	0	0	0	0	0	0	0	6	1500	0	1	0	1	0	0	0	NA	NA	0	1	6.1	9.7	0	30	3	transfer	1	1	11	7	0	0
240	Stage 2	QZ	male	72	175	75	24.5	1	0	0	0	0	0	1	4	1625	0	0	0	0	0	0	1	24	2	55.4	0	6.8	10	0	22	8	transfer	1	1	15	63	0	0
241	Stage 2	QZ	male	79	170	60	20.76	1	0	0	0	0	0	0	3	1500	0	0	0	1	0	0	1	NA	2	6.7	1	6	15	0	9	2	transfer	1	1	51	51	0	0
242	Stage 2	QZ	female	68	160	70	27.3	0	1	0	0	1	0	0	3	1375	0	1	0	1	0	0	0	NA	2	NA	1	6.2	18	50	21	11	transfer	1	1	15	4	1	0
243	Stage 2	QZ	male	59	180	80	24.7	1	0	0	0	0	0	0	3	1750	1	1	1	0	0	0	1	24	1	2.9	0	8.9	12.7	50	15	9	die	0	1	17	17	1	1
244	Stage 2	QZ	male	56	172	65	21.97	1	0	0	1	0	1	1	4	1625	0	1	1	0	0	0	1	24	1	3	0	8	10	50	26	13	transfer	1	1	12	12	0	0
245	Stage 2	QZ	female	74	165	45	16.52	1	0	0	0	0	1	1	4	1125	1	1	0	1	0	0	1	24	1	4.4	0	6.3	10	0	13	5	discharge	1	1	13	8	0	0
246	Stage 2	QZ	female	61	158	60	24	1	0	0	1	0	1	1	4	1325	0	1	0	1	0	0	0	NA	NA	NA	0	6.2	8.9	0	12	5	discharge	1	1	16	9	0	0
247	Stage 2	QZ	female	20	165	52	19.1	1	0	0	0	1	0	0	3	1500	1	1	1	0	0	0	0	NA	1	3.3	1	8	10	10	21	8	transfer	1	1	6	4	0	0
248	Stage 2	QZ	male	55	170	65	22.5	0	0	1	0	0	0	0	3	1500	1	1	1	0	0	0	0	NA	2	3.3	1	8	10	0	19	6	transfer	1	1	22	45	0	0
249	Stage 2	QZ	female	86	168	65	23	0	0	1	0	0	0	0	3	1625	0	1	1	0	0	0	1	24	1	3	0	6.8	9.2	0	25	4	AAD	1	1	22	22	1	0
250	Stage 2	QZ	female	71	160	50	19.53	1	0	0	0	0	0	0	3	1375	0	1	1	0	0	0	1	24	1	3.6	0	8	10	50	20	7	transfer	1	1	45	8	0	0
251	Stage 2	QZ	male	61	168	56	19.8	0	0	1	0	0	0	0	3	1400	0	1	1	0	0	0	1	24	1	3.6	0	7.5	15.6	0	15	5	transfer	1	1	20	8	0	0
252	Stage 2	QZ	male	76	175	65	21.2	1	0	0	1	1	1	0	3	1625	0	1	1	0	0	0	0	NA	NA	NA	1	6	10	0	17	11	transfer	1	1	11	9	0	0
253	Stage 2	QZ	male	79	176	75	24.2	0	0	1	0	1	0	1	4	1875	1	1	0	1	0	0	0	NA	NA	NA	1	4.8	8.6	0	33	16	transfer	1	1	52	46	0	0
254	Stage 2	QZ	male	70	171	65	22	1	0	0	0	0	0	0	3	1625	0	1	1	0	0	0	1	24	1	3.1	0	8	10	0	17	4	transfer	1	1	9	7	0	0
255	Stage 2	QZ	male	67	170	55	19	1	0	0	0	1	0	0	3	1375	1	1	1	0	0	0	0	NA	NA	NA	1	3.5	10	0	31	22	AAD	1	1	5	5	0	0
256	Stage 2	QZ	female	77	172	55	18.6	1	0	0	0	0	1	1	4	1375	0	1	1	0	0	0	1	24	1	3.6	0	6.2	7.8	0	16	5	AAD	0	1	17	17	0	1
257	Stage 2	QZ	male	74	172	68	23	1	0	0	0	0	1	0	3	1700	0	1	1	0	0	0	1	24	1	2.9	0	8.5	10	0	NA	NA	transfer	1	1	5	3	0	0
258	Stage 2	QZ	female	46	165	50	18.4	1	0	0	0	1	0	1	5	1375	0	1	1	0	0	0	1	24	1	3.6	0	6.2	8.9	0	NA	NA	discharge	1	1	30	15	0	0
259	Stage 2	QZ	female	71	168	65	23	1	0	0	0	0	0	1	4	1625	0	1	1	0	0	0	1	24	1	3.1	0	7.8	10.2	3	15	5	transfer	1	1	28	28	1	0
260	Stage 2	QZ	female	74	168	50	17.7	1	0	0	0	0	0	1	4	1250	0	1	1	0	0	0	1	NA	NA	5	0	7.2	8.5	0	25	3	transfer	1	1	16	16	1	0
261	Stage 2	QZ	male	12	175	54	17.63	0	0	1	0	0	0	0	3	1350	0	0	0	0	0	0	0	NA	NA	NA	1	6.8	11	0	NA	NA	transfer	1	1	5	2	0	0
262	Stage 1	JH	male	21	175	48	15.6	0	0	1	0	0	0	1	3	1440	0	1	0	1	0	0	1	18	1	34	0	6	10	0	22	5	transfer	1	1	30	18	1	0
263	Stage 1	JH	male	62	168	55	19.487	0	0	0	0	0	0	0	5	1500	0	1	1	0	0	0	0	NA	NA	NA	1	6	6.9	NA	14	5	transfer	1	1	6	0	0	0
264	Stage 1	JH	male	53	167	75	26.89	0	0	0	0	0	0	0	5	1750	1	1	1	0	0	0	0	NA	NA	NA	1	NA	NA	NA	21	NA	die	0	0	6	6	0	1
265	Stage 1	JH	male	60	165	60	22.039	0	0	1	0	0	0	0	4	1500	0	1	1	0	0	0	0	NA	NA	NA	0	12.9	27.3	60	NA	5	die	0	0	15	15	1	1
266	Stage 2	JH	male	62	157	60	24.37	1	0	0	0	0	0	0	NA	NA	0	1	0	0	0	0	1	1	1	80	0	8	10	0	20	NA	AAD	1	1	6	6	0	0
267	Stage 2	JH	male	69	165	68	25	1	0	0	1	1	0	0	NA	1537	1	1	0	0	0	0	0	NA	NA	NA	0	NA	NA	NA	59	NA	AAD	0	1	6	6	0	1
268	Stage 2	JH	female	70	160	58	23	1	0	0	0	0	1	1	NA	1310	0	0	0	0	0	0	1	24	1	38.2	0	5	10	0	35	NA	discharge	1	1	14	0	0	0
269	Stage 2	JH	female	44	160	65	25	1	0	0	0	1	0	0	NA	1310	0	1	0	0	0	0	0	NA	NA	NA	0	6	15	NA	18	NA	transfer	1	1	13	3	0	0
270	Stage 2	JH	male	47	165	70	31	1	0	1	0	0	0	0	NA	1195	0	1	0	0	0	0	1	NA	1	83.7	0	6	15	0	28	NA	transfer	1	1	4	4	0	0
271	Stage 2	JH	male	75	170	70	24	1	0	0	0	0	0	0	NA	1650	0	1	0	0	0	0	1	NA	1	30.3	0	9	15	0	20	NA	discharge	1	1	3	3	0	0
272	Stage 2	JH	female	79	160	65	25	1	0	0	1	1	0	1	NA	1310	1	1	0	0	0	0	1	NA	1	38.2	0	5	18	10	32	NA	die	0	1	7	7	0	1
273	Stage 2	JH	male	67	168	70	24.8	1	0	0	0	0	0	0	3	1575	0	0	0	1	0	0	0	NA	NA	NA	0	NA	NA	NA	19	4	discharge	1	1	3	3	0	0
274	Stage 2	JH	male	65	175	80	26	0	0	1	0	0	0	0	NA	1750	0	1	0	0	0	0	1	NA	NA	57.1	0	6	19	10	28	NA	transfer	1	1	5	4	0	0
275	Stage 2	JH	male	81	165	65	24	1	0	0	0	0	0	0	NA	1625	0	0	0	0	0	0	1	NA	1	30.8	0	5	16	0	29	NA	die	0	1	27	27	0	1
276	Stage 2	JH	male	69	156	60	25	1	0	0	0	0	0	1	5	1275	0	1	0	0	0	0	0	NA	1	78.4	0	6	16	10	26	NA	AAD	1	1	13	13	0	0
277	Stage 2	JH	male	79	166	65	24	1	0	0	0	0	0	0	NA	1560	0	1	0	0	0	0	1	NA	1	32	0	5	10	NA	26	NA	discharge	1	1	7	7	0	0
278	Stage 1	HZ	male	79	170	55	19.03	1	0	1	1	0	1	1	3	1375	0	1	1	0	0	0	1	0	1	54.5	1	3.5	9.3	0	15	2	transfer	1	1	6	3	0	0
279	Stage 1	HZ	female	53	160	60	23.43	1	1	1	1	0	1	1	3	1500	0	1	1	0	0	0	0	NA	NA	NA	1	8.7	16	0	11	2	die	1	1	10	10	0	0
280	Stage 1	HZ	male	77	175	60	19.6	1	1	1	1	0	0	1	4	1775	0	1	1	0	0	0	0	NA	NA	NA	0	5.8	6.98	0	19	3	discharge	1	1	24	16	0	0
281	Stage 1	HZ	male	55	175	75	24.48	1	1	1	0	0	1	1	4	1875	0	1	1	0	0	0	1	4	1	40	1	4.6	10.3	0	16	7	AAD	1	0	55	55	0	0
282	Stage 1	HZ	male	69	175	75	24.5	1	1	0	1	0	0	1	3	1875	0	1	1	0	0	0	0	NA	1	80	1	1.08	7	0	19	8	AAD	0	1	11	11	0	1
283	Stage 1	HZ	female	71	160	48	30	1	0	0	0	1	0	0	NA	1500	0	1	1	0	0	0	1	10	1	50	1	5.96	8.5	0	18	8	AAD	0	1	2	2	0	1
284	Stage 1	HZ	male	79	178	80	25.2	1	0	0	0	0	0	1	3	2000	0	1	1	0	0	0	1	20	1	25	1	6	11	40	17	4	discharge	1	1	9	3	0	0
285	Stage 1	HZ	male	64	175	55	17.9	1	0	0	0	0	1	1	4	1375	0	1	1	0	0	0	0	NA	NA	NA	1	7.7	11.6	50	21	7	discharge	1	1	8	2	0	0
286	Stage 1	HZ	male	85	172	60	23.67	1	0	0	0	0	0	1	4	1500	1	1	1	0	0	0	0	NA	1	NA	1	8.5	12.3	0	24	7	discharge	1	1	34	14	0	0
287	Stage 1	HZ	male	56	172	65	21.97	1	0	0	1	0	1	1	4	1625	1	1	1	0	0	0	0	NA	1	NA	1	5.9	14.3	0	25	11	AAD	1	1	NA	NA	0	0
288	Stage 1	HZ	male	62	173	70	23.38	1	0	0	0	0	1	1	4	1750	0	1	1	0	0	0	0	NA	1	NA	1	6.7	10.9	50	22	4	AAD	0	1	15	15	1	1
289	Stage 1	HZ	female	75	155	50	20.81	1	1	1	0	0	0	1	4	1250	1	1	1	0	0	0	1	7	1	60	0	6.2	8.3	0	23	6	transfer	1	1	65	30	0	0
290	Stage 1	HZ	female	74	155	48	19.98	1	0	0	0	1	0	1	4	1200	0	1	1	0	0	0	0	NA	1	NA	1	9.6	42.5	68	28	8	discharge	1	1	23	9	0	0
291	Stage 1	HZ	female	66	160	55	21.48	1	0	0	0	0	0	0	3	1375	0	1	1	0	0	0	1	NA	1	54.5	0	7.2	17	25	25	4	die	0	1	26	26	0	1
292	Stage 1	HZ	male	75	175	60	19.6	1	0	0	0	0	1	1	4	1500	0	1	1	0	0	0	1	6	1	50	1	4.4	17.3	0	19	3	transfer	1	1	6	2	0	0
293	Stage 1	HZ	male	69	172	60	20.3	1	0	0	0	0	1	1	4	1500	1	1	1	0	0	0	1	12	1	50	1	3.4	17.2	0	18	10	transfer	1	1	6	3	0	0
294	Stage 1	HZ	female	81	155	55	22.9	1	0	0	0	0	0	1	5	1375	0	0	1	0	0	0	0	NA	1	NA	1	NA	NA	0	16	6	AAD	1	0	30	28	0	0
295	Stage 1	HZ	male	41	175	70	22.85	1	0	0	1	1	0	1	4	1750	1	1	1	0	0	0	0	NA	1	NA	1	5.4	9.2	0	34	9	discharge	1	1	14	3	0	0
296	Stage 1	HZ	male	47	175	65	21.22	1	0	0	0	0	0	1	3	1625	0	0	1	0	0	0	0	NA	NA	NA	1	5.4	9.6	0	16	16	discharge	0	1	16	6	0	1
297	Stage 1	HZ	male	32	165	70	25.7	1	0	0	0	0	1	0	4	1750	0	1	1	0	0	0	0	NA	1	NA	1	6	7.7	0	NA	NA	transfer	1	1	7	3	0	0
298	Stage 2	HZ	male	67	170	75	25.95	1	0	0	0	0	0	1	3	1625	0	1	1	0	0	0	1	NA	1	92.3	1	5.9	12.9	0	15	5	transfer	1	1	17	4	0	0
299	Stage 2	HZ	female	87	162	58	22	1	0	0	1	1	0	0	5	1700	0	0	1	0	0	0	1	1	1	22	0	9.7	15	52	22	5	die	0	0	8	8	0	1
300	Stage 2	HZ	male	81	173	80	26.73	1	0	0	0	0	0	1	4	2040	0	1	1	0	0	0	0	NA	1	NA	0	5.4	7.1	0	26	9	transfer	1	1	5	4	0	0
301	Stage 2	HZ	male	64	178	70	22.09	1	0	0	1	0	0	1	6	2190	0	1	1	0	0	0	0	NA	1	NA	0	5.3	11.4	0	30	15	transfer	0	0	12	6	0	1
302	Stage 2	HZ	male	75	165	60	22.04	1	0	0	1	1	0	0	5	1800	0	1	1	0	0	0	0	7	1	NA	0	7.2	12.2	0	24	5	transfer	0	0	11	11	0	1
303	Stage 2	HZ	female	59	160	60	23.44	1	0	0	0	0	0	1	3	1572	0	1	1	0	0	0	0	NA	1	NA	0	9.2	21	36	24	8	transfer	1	1	88	88	0	0
304	Stage 2	HZ	male	75	170	60	20.76	0	1	1	0	0	0	1	3	1980	0	1	1	0	0	0	0	NA	1	NA	0	8	13.1	0	24	7	transfer	1	1	6	6	0	0
305	Stage 2	HZ	male	64	170	60	20.76	1	0	0	0	0	0	1	4	1980	0	0	1	0	0	0	0	NA	1	NA	0	5.8	17.2	18	15	5	die	0	0	7	5	0	1
306	Stage 1	LS	male	47	170	80	NA	0	0	0	0	0	0	0	4	2400	0	1	1	0	0	0	1	18	1	63	0	NA	NA	NA	8	NA	discharge	1	1	52	27	1	0
307	Stage 1	LS	male	74	173	70	23.39	1	1	0	1	1	0	0	4	1800	0	0	0	0	0	1	1	19	NA	28	0	6.5	15.5	NA	27	NA	transfer	1	1	8	NA	0	0
308	Stage 1	LS	male	86	NA	NA	NA	0	0	0	0	1	0	0	4	1625	0	0	0	1	0	0	0	NA	1	30.8	1	5.6	11.1	NA	34	NA	die	0	1	3	NA	0	1
309	Stage 1	LS	male	84	170	70	24.2	0	0	0	0	0	0	0	4	1500	0	0	1	0	0	0	0	NA	1	NA	1	5.6	10.5	NA	20	NA	AAD	0	1	1	NA	0	1
310	Stage 1	LS	male	59	172	62	20.9	1	0	0	1	0	0	1	3	1800	1	1	1	0	0	0	1	8	1	83	1	18.7	6.6	86	NA	NA	transfer	1	1	20	10	1	0
311	Stage 1	LS	female	72	150	50	22.22	1	0	0	0	1	0	0	4	1500	0	1	1	0	0	0	1	2	1	68	0	7	9	NA	11	4	AAD	0	1	33	33	0	1
312	Stage 1	LS	male	23	170	54	18.6	1	1	1	1	0	0	1	4	1350	0	1	1	0	0	0	1	1	1	100	1	8	10	0	11	4	transfer	1	1	15	4	0	0
313	Stage 1	LS	female	61	155	60	24.9	1	1	0	0	0	0	1	5	1800	0	1	1	0	0	0	1	48	NA	28	0	10	11	0	9	4	transfer	1	1	10	4	0	0
314	Stage 1	LS	female	25	160	50	NA	0	0	1	0	0	0	0	4	1500	0	1	1	0	0	0	0	NA	1	50	1	15	18	80	10	3	transfer	1	1	28	20	1	0
315	Stage 1	LS	male	77	165	65	23.87	0	1	0	0	1	0	1	4	1800	0	0	0	1	0	0	1	NA	NA	41.7	0	6.8	11.2	NA	15	NA	transfer	1	1	11	3	1	0
316	Stage 1	LS	female	63	158	55	NA	1	0	0	0	0	0	0	NA	1650	0	0	1	0	0	0	0	NA	1	91	0	NA	NA	NA	NA	NA	transfer	1	1	6	3	0	0
317	Stage 1	LS	female	70	158	50	NA	1	0	0	0	0	0	0	4	1500	0	1	1	0	0	0	0	NA	NA	50	0	NA	NA	NA	NA	NA	AAD	0	1	4	4	0	1
318	Stage 1	LS	male	61	170	70	NA	1	1	0	0	1	0	1	4	2100	0	1	0	1	0	0	1	NA	1	71.4	1	13	15	7	6	2	transfer	1	1	7	0	1	0
319	Stage 1	LS	male	49	160	65	25	0	0	1	0	0	0	1	4	1900	0	1	1	0	0	0	1	12	1	79	0	13	18	80	9	2	transfer	1	1	NA	NA	1	0
320	Stage 2	LS	female	83	155	NA	NA	1	0	0	0	1	0	1	3	1437	1	1	1	0	0	0	1	8	1	52.2	0	10	15	80	12	5	transfer	1	1	11	8	0	0
321	Stage 2	LS	male	84	165	52	19	1	0	0	0	1	0	1	3	1820	1	0	1	0	0	0	1	8	1	41	0	8	12	20	12	6	AAD	0	1	NA	NA	1	1
322	Stage 2	LS	female	83	NA	NA	NA	0	0	0	0	0	0	0	NA	NA	0	0	0	0	0	0	0	NA	NA	NA	0	NA	NA	NA	NA	NA		1	1	NA	NA	0	0
323	Stage 2	LS	male	29	175	90	NA	1	0	0	1	1	0	1	3	2471	1	1	1	0	0	0	1	8	1	NA	0	9	15	60	14	8	transfer	1	1	10	3	0	0
324	Stage 2	LS	male	67	165	65	NA	1	0	1	0	1	0	1	3	1845	1	1	0	1	0	0	1	16	1	27	0	6	12	40	12	8	transfer	1	1	5	3	0	0
325	Stage 2	LS	male	83	154	50	21.1	1	0	0	0	0	0	1	6	1225	0	1	1	0	0	0	1	NA	1	40.8	0	9.6	15.4	8	18	NA	transfer	1	1	4	4	0	0
326	Stage 2	LS	female	38	160	65	25.4	1	0	0	0	0	1	1	NA	1925	1	1	1	0	0	0	0	NA	1	53	0	13.2	17.5	12	23	NA	transfer	1	1	7	7	0	0
327	Stage 2	LS	male	56	170	55	5	0	1	0	0	0	0	1	4	1800	1	1	0	1	0	0	1	6	1	41.6	0	10	16	230	18	10	discharge	1	1	12	8	1	0
328	Stage 2	LS	female	62	160	60	23	1	0	0	0	0	0	1	4	1500	0	0	1	0	0	0	1	8	1	50	0	10	12	180	12	8	transfer	1	1	33	15	1	0
329	Stage 2	LS	female	56	156	63	26	1	0	0	1	0	0	0	4	1500	1	1	1	0	0	0	1	10	1	50	0	9	10	80	12	1	transfer	1	1	17	15	1	0
330	Stage 2	LS	female	84	152	80	34	1	0	0	0	1	0	1	NA	1350	0	0	1	0	0	0	1	8	1	55	0	12	16	200	12	8	discharge	1	1	12	8	1	0
331	Stage 2	LS	male	65	165	52	19	0	0	1	0	0	0	0	4	1820	0	1	0	0	0	0	1	12	NA	82.4	1	7.9	13	NA	28	5	transfer	1	1	31	31	1	0
332	Stage 2	LS	male	77	160	65	25	1	0	0	0	0	0	1	3	1680	0	1	1	0	0	0	1	NA	1	30	0	12	20	120	15	8	die	0	1	15	11	1	1
333	Stage 2	LS	male	75	168	44	15	1	0	0	1	0	0	1	4	1600	1	1	1	0	0	0	1	5	1	46.9	0	12	15	0	12	8	die	1	1	NA	NA	0	0
334	Stage 2	LS	male	66	170	NA	NA	1	0	0	1	0	0	1	3	2310	0	0	1	0	0	0	1	6	1	32	0	10	13	60	12	6	discharge	1	1	6	4	0	0
335	Stage 1	TZ	female	66	160	60	23.4	1	0	0	0	0	0	0	3	1500	0	1	1	0	0	0	1	4	1	33.3	0	8.1	12.3	1	25	3	die	1	1	14	14	1	0
336	Stage 1	TZ	male	54	172	70	23.7	1	0	0	0	0	1	0	3	1750	1	1	0	0	1	0	0	NA	NA	NA	0	7.2	16.5	50	19	12	transfer	1	1	21	19	1	0
337	Stage 1	TZ	male	63	175	70	22.85	1	0	0	0	0	0	0	NA	1750	1	1	1	0	0	0	0	NA	NA	NA	0	8.8	9.54	0	25	11	AAD	1	1	89	89	0	0
338	Stage 1	TZ	male	83	NA	NA	NA	1	0	0	0	0	0	1	6	1500	0	1	1	0	0	0	0	NA	NA	NA	1	4.7	10.5	0	15	3	transfer	1	1	11	5	0	0
339	Stage 1	TZ	female	67	155	50	20.8	0	0	0	0	0	0	1	6	1250	1	1	1	0	0	0	0	NA	NA	NA	1	6	10.9	0	18	3	AAD	1	1	NA	NA	0	0
340	Stage 1	TZ	female	80	155	50	22.9	1	0	0	0	0	0	1	6	1250	1	1	1	0	0	0	0	NA	NA	NA	1	5	8.1	50	21	3	transfer	1	1	28	18	0	0
341	Stage 1	TZ	female	84	160	55	21.5	1	0	0	0	0	0	0	4	1375	1	1	1	0	0	0	1	7	1	33	0	5.8	14.8	50	19	2	AAD	1	1	7	7	1	0
342	Stage 1	TZ	male	57	180	60	18.5	1	0	0	0	0	0	0	6	1500	1	1	1	0	0	0	1	8	1	66.7	1	5.5	8.6	0	24	6	AAD	1	1	19	19	0	0
343	Stage 1	TZ	female	68	160	50	19.5	1	0	0	0	0	0	0	4	1250	1	1	1	0	0	0	0	NA	NA	NA	1	9	11.5	1	17	9	die	0	1	11	11	0	1
344	Stage 1	TZ	male	73	178	70	22	1	0	0	1	0	0	0	NA	1750	1	1	1	0	0	0	0	NA	NA	NA	0	5	7.3	1	43	12	transfer	1	1	7	3	0	0
345	Stage 1	TZ	male	79	175	70	22.8	1	0	0	0	0	1	0	NA	1750	0	1	1	0	0	0	1	2	1	NA	0	8.3	10.3	1	NA	NA	AAD	1	1	68	68	0	0
346	Stage 2	TZ	male	43	170	60	20	1	0	0	0	0	0	0	3	1500	0	1	1	0	0	0	0	NA	NA	NA	0	8.1	20	1	2	2	transfer	1	1	10	7	0	0
347	Stage 2	TZ	female	40	160	65	25.4	1	0	0	0	0	0	0	3	1625	0	0	0	0	0	1	0	NA	NA	NA	1	6	10	1	11	3	transfer	1	1	12	0	0	0
348	Stage 2	TZ	female	70	155	42	17.5	0	1	0	0	0	0	1	5	1250	1	1	1	0	0	0	0	NA	NA	NA	0	8	10	50	16	13	transfer	1	1	7	5	0	0
349	Stage 2	TZ	male	49	175	70	22.8	0	0	1	0	0	0	0	3	1750	0	1	1	0	0	0	0	NA	NA	NA	0	6	10	NA	19	5	transfer	1	1	4	4	0	0
350	Stage 2	TZ	male	91	170	50	17.3	1	0	0	0	0	0	1	5	1250	1	1	1	0	0	0	0	NA	NA	NA	0	6	10	NA	20	8	AAD	1	1	12	10	0	0
351	Stage 2	TZ	male	78	175	65	21.2	1	0	0	0	0	0	0	4	1750	1	1	1	0	0	0	1	12	1	28.6	0	8	10	NA	21	9	transfer	1	1	7	4	0	0
352	Stage 2	TZ	female	70	150	40	17.8	1	0	0	0	0	1	1	6	1000	1	1	1	0	0	0	0	NA	NA	NA	0	8	10	NA	19	5	transfer	1	1	6	5	0	0
353	Stage 2	TZ	female	68	158	59	23.6	1	0	0	0	0	0	0	4	1500	0	0	0	0	0	0	0	NA	NA	NA	1	8	10	NA	16	3	transfer	1	1	10	NA	0	0
354	Stage 2	TZ	male	51	170	60	20.8	1	0	0	0	0	1	0	3	1500	0	1	1	0	0	0	0	NA	NA	NA	0	6	10	NA	8	5	transfer	1	1	7	3	0	0
355	Stage 2	TZ	male	36	172	65	22	1	0	0	1	0	1	0	3	1625	1	1	0	1	0	0	0	NA	NA	NA	0	6	10	NA	22	4	discharge	1	1	9	9	0	0
356	Stage 2	TZ	female	75	160	70	27.3	1	0	0	0	0	0	0	4	1750	0	1	1	0	0	0	0	NA	NA	NA	0	8	10	NA	18	3	transfer	1	1	8	7	0	0
357	Stage 2	TZ	male	64	175	65	21.2	1	0	0	0	0	0	0	3	1625	0	1	1	0	0	0	0	NA	NA	NA	0	6	10	NA	21	6	die	0	1	18	18	0	1
358	Stage 2	TZ	male	47	178	65	20.5	1	0	0	1	0	1	0	3	1625	1	1	1	0	0	0	0	NA	NA	NA	0	6	10	NA	28	14	discharge	1	1	7	7	0	0
359	Stage 2	TZ	female	75	155	46	19.15	1	0	0	0	0	0	0	3	1150	0	1	1	0	0	0	1	21	1	86.9	0	6	10	NA	16	9	transfer	1	1	6	NA	0	0
360	Stage 2	TZ	male	66	178	85	26.8	1	0	0	0	0	0	0	3	1825	0	0	1	0	0	0	0	NA	NA	NA	0	6	10	NA	10	3	transfer	1	1	9	0	0	0
361	Stage 2	TZ	male	63	170	55	19	1	0	0	0	0	0	1	4	1375	0	1	1	0	0	0	1	9	1	NA	0	8	10	NA	12	1	AAD	1	1	9	9	0	0
362	Stage 2	TZ	male	91	168	52	18.4	1	0	0	0	0	0	1	4	1300	0	0	1	0	0	0	0	NA	NA	NA	1	8	10	NA	18	5	transfer	1	1	24	0	0	0
363	Stage 2	TZ	female	78	155	40	16.6	1	0	0	0	0	1	0	3	1250	0	1	1	0	0	0	1	NA	1	40	0	8	10	NA	13	6	transfer	1	1	11	4	0	0
364	Stage 2	TZ	male	66	170	70	24.2	0	0	1	0	0	0	0	3	1750	0	1	1	0	0	0	1	10	1	28.5	0	6	10	50	15	5	transfer	1	1	5	3	0	0
365	Stage 2	TZ	female	90	155	40	16.64	1	0	0	0	0	0	1	4	1250	0	1	1	0	0	0	1	9	1	80	0	8	10	NA	21	2	transfer	1	1	5	2	0	0
366	Stage 2	TZ	female	68	160	55	21.5	1	0	0	1	1	0	1	6	1375	0	1	1	0	0	0	1	NA	1	36.4	0	8	10	NA	21	6	discharge	1	1	18	18	0	0
367	Stage 2	TZ	male	81	170	70	24.2	0	0	1	0	0	0	0	3	1750	0	1	1	0	0	0	0	NA	NA	NA	1	8	10	NA	23	18	discharge	1	1	4	4	0	0
368	Stage 2	TZ	female	59	165	80	29.4	1	0	0	0	0	0	0	4	2000	0	1	1	0	0	0	0	NA	NA	NA	0	8	10	NA	20	5	discharge	1	1	7	7	0	0
369	Stage 2	TZ	female	54	158	60	24	1	0	0	0	0	0	0	3	1500	1	1	1	0	0	0	1	8	1	33.3	0	6	10	NA	20	6	die	1	1	10	10	0	0
370	Stage 2	TZ	male	75	170	55	19	1	0	0	0	0	0	1	6	1375	0	1	1	0	0	0	1	1	1	36.4	0	7	10	1	19	7	discharge	1	1	11	11	0	0
371	Stage 2	TZ	female	88	145	45	21.4	1	0	0	0	0	0	0	5	1125	1	1	1	0	0	0	0	NA	NA	NA	0	8	10	50	15	4	die	1	1	10	10	0	0
372	Stage 2	TZ	female	56	160	50	19.5	1	0	0	0	0	0	0	6	1250	1	1	1	0	0	0	0	NA	NA	NA	1	6	10	NA	23	12	AAD	1	1	13	13	0	0
373	Stage 2	TZ	female	78	150	40	17.8	1	0	0	0	0	0	1	6	1000	0	1	1	0	0	0	1	8	1	50	0	8	10	NA	12	2	AAD	1	1	9	9	0	0
374	Stage 2	TZ	female	80	150	40	17.8	1	0	0	0	0	1	0	3	1000	0	1	1	0	0	0	1	12	1	50	0	8	10	NA	9	4	discharge	1	1	5	3	0	0
375	Stage 1	YW	male	84	170	70	24.22	1	0	0	0	0	0	1	6	2100	0	0	0	0	0	0	1	12	2	100	0	7.3	10.4	NA	24	2	die	1	0	73	73	1	0
376	Stage 1	YW		NA	NA	NA	NA	0	0	0	0	0	0	0	NA	NA	0	0	0	0	0	0	0	NA	NA	NA	0	NA	NA	NA	NA	NA		1	1	NA	NA	0	0
377	Stage 1	YW	female	42	165	120	44.08	0	0	1	0	0	0	0	3	3600	0	1	1	0	0	0	1	8	1	13.9	0	9.8	16	NA	24	9		0	1	7	7	0	1
378	Stage 1	YW		NA	NA	NA	NA	0	0	0	0	0	0	0	NA	NA	0	0	0	0	0	0	0	NA	NA	NA	0	NA	NA	NA	NA	NA		1	1	NA	NA	0	0
379	Stage 1	YW	male	64	170	65	NA	0	1	0	0	0	0	0	3	1950	1	1	1	0	0	0	0	NA	1	25.6	0	6.4	16.2	NA	13	2	discharge	1	1	33	33	1	0
380	Stage 1	YW	male	75	170	70	24.22	0	0	1	0	0	0	0	4	2100	0	1	1	0	0	0	1	12	1	23.8	0	6.5	8.2	0	22	5	discharge	1	1	19	16	0	0
381	Stage 1	YW	female	67	162	65	23.88	0	0	1	0	0	0	0	3	1500	0	0	0	1	0	0	0	NA	1	NA	0	5.3	9.2	NA	17	2	transfer	1	1	6	2	0	0
382	Stage 1	YW	male	51	170	65	22.5	0	0	1	0	1	0	0	3	NA	0	1	1	0	0	0	1	14.5	1	25	0	6.2	10	NA	18	2	discharge	1	1	7	5	0	0
383	Stage 1	YW	male	37	175	130	NA	0	0	1	0	0	1	0	3	3900	1	1	1	0	0	0	1	14	1	12.8	0	6.6	8.1	NA	9	9	discharge	1	1	9	9	1	0
384	Stage 1	YW	male	61	170	70	24.2	0	0	1	0	0	0	1	6	2000	0	1	0	1	0	0	1	12	2	25	0	6.5	12	NA	20	11	discharge	1	1	10	7	1	0
385	Stage 1	YW	male	61	174	75	24.77	0	0	0	0	0	0	0	NA	2625	0	1	1	0	0	0	1	24	2	19	0	8.1	9	0	25	5	transfer	1	1	20	14	1	0
386	Stage 1	YW	male	37	171	92	31.5	1	0	0	0	0	0	0	NA	1860	0	0	0	0	1	0	0	NA	1	NA	0	9.3	13.3	NA	9	2	transfer	1	1	5	0	0	0
387	Stage 1	YW	male	86	170	70	24.22	1	0	0	0	0	0	1	6	2100	1	1	1	0	0	0	1	12	1	23.81	0	6.8	10	0	16	7	die	0	0	22	22	1	1
388	Stage 1	YW	male	57	165	75	27.5	0	0	1	0	1	0	0	3	2250	0	1	1	0	0	0	0	NA	1	NA	0	6.8	9.4	NA	27	0	discharge	0	0	6	6	0	1
389	Stage 1	YW	female	40	160	60	23.4	0	0	1	0	0	0	0	3	1800	0	1	1	0	0	0	0	NA	1	27.8	0	6	10	NA	21	3	transfer	1	1	14	10	1	0
390	Stage 1	YW	male	45	172	65	22	1	0	0	0	0	0	0	3	2000	0	1	0	1	0	0	0	NA	1	25	0	6.5	8.8	NA	25	4	discharge	1	1	12	12	2	0
391	Stage 1	YW	male	65	160	70	27.3	0	0	1	0	1	0	0	3	2100	0	1	0	0	0	0	1	8	1	23.8	0	6.7	7	NA	20	6	discharge	1	1	32	14	1	0
392	Stage 1	YW	male	70	160	47	18.35	1	0	0	1	0	1	1	7	1410	1	1	1	0	0	0	1	12	1	35	0	6.9	8.2	NA	16	16	transfer	1	1	24	20	0	0
393	Stage 1	YW	male	65	170	60	21.1	0	0	1	0	0	0	0	3	1800	0	1	1	0	0	0	1	10	1	27.8	0	6.1	7.8	NA	9	9	discharge	1	1	4	3	0	0
394	Stage 1	YW	female	83	157	50	21.23	1	0	0	0	0	0	1	5	1750	0	1	1	0	0	0	1	25	1	28.5	0	6.7	11.3	0	13	7	transfer	1	1	15	5	0	0
395	Stage 1	YW	female	66	160	55	21.5	0	0	1	0	1	0	0	3	1650	0	1	1	0	0	0	1	24	1	30	0	6.3	6.6	NA	9	9	transfer	1	1	16	6	0	0
396	Stage 1	YW	male	48	175	75	25.95	0	0	1	0	1	0	0	3	2250	0	1	1	0	0	0	1	23	1	22	0	6.9	10.2	NA	35	10	transfer	1	1	29	15	0	0
397	Stage 1	YW	female	86	155	50	20.8	1	0	0	0	0	0	0	4	1500	1	1	1	0	0	0	1	19	1	33.3	0	6.6	10.8	NA	20	6		1	1	NA	23	0	0
398	Stage 1	YW	male	45	170	75	25	0	1	0	0	0	0	0	NA	2250	1	1	1	0	0	0	1	18	1	22.22	0	9.3	11.3	NA	8	7	transfer	1	0	33	30	0	0
399	Stage 1	YW	male	55	175	75	24.77	0	0	1	0	0	1	0	3	2250	1	1	1	0	0	0	1	11	1	18.9	0	7.8	13.1	0	10	9		1	1	33	33	1	0
400	Stage 2	YW	male	48	165	60	22	0	0	1	0	0	0	0	NA	1800	1	1	1	0	0	0	1	16	1	42	0	5.7	9.4	0	16	3	transfer	1	1	10	8	1	0
401	Stage 2	YW	female	62	164	50	18.59	0	0	1	0	0	0	1	3	1500	0	1	1	0	0	0	1	16	1	58	0	8.7	15.6	20	17	7	transfer	1	1	7	12	1	0
402	Stage 2	YW	male	47	175	70	22.86	0	0	1	0	0	0	0	NA	2100	0	1	0	1	0	0	0	NA	1	0	0	7	8.2	0	29	7	AAD	1	1	20	20	1	0
403	Stage 2	YW	female	36	165	70	25.7	0	0	1	0	0	0	0	NA	2100	1	1	1	0	0	0	1	22	NA	44	0	8.9	11.4	0	16	3	transfer	1	1	7	8	1	0
404	Stage 2	YW	male	79	172	65	21.9	1	0	0	0	0	0	0	3	2100	0	1	1	0	0	0	1	9	1	55.8	0	6.7	9.3	0	23	5	discharge	1	1	7	4	1	0
405	Stage 2	YW	female	80	160	50	19.53	1	0	0	0	0	1	0	4	1500	0	1	1	0	0	0	0	NA	1	NA	0	6.5	8.4	0	15	3	discharge	1	1	7	4	0	0
406	Stage 2	YW	female	52	160	60	23.4	0	1	0	0	0	0	0	NA	1800	0	1	1	0	0	0	1	7	1	39	0	5.3	7.4	NA	13	3	die	0	1	19	19	1	1
407	Stage 2	YW	female	81	153	45	19.2	1	0	0	0	1	0	0	4	1350	1	1	1	0	0	0	1	16	1	52	0	12.5	22.3	0	14	3		1	1	44	39	1	0
408	Stage 2	YW	male	41	170	80	27	0	1	0	0	0	0	0	NA	2400	0	1	1	0	0	0	1	NA	2	18.3	0	10.5	12.7	NA	NA	NA	discharge	1	1	26	26	1	0
409	Stage 2	YW	male	79	165	60	22	1	0	0	0	0	0	0	5	1800	1	1	1	0	0	0	1	16	1	48	0	6.2	9.7	0	6	18	discharge	1	1	4	3	0	0
410	Stage 2	YW	male	69	160	60	23.4	1	0	0	0	1	0	0	NA	1800	1	1	1	0	0	0	0	NA	1	44.4	0	4.5	9.2	0	36	15		1	1	NA	9	1	0
